# Supplementary material
Source: PubMed Central journal article supplement (PMC4104866)
Supplement: 1402039111_pnas.201402039SI.pdf [file 1402039111_pnas.201402039SI.pdf]

# Supporting Information

Hove et al. 10.1073/pnas.1402039111

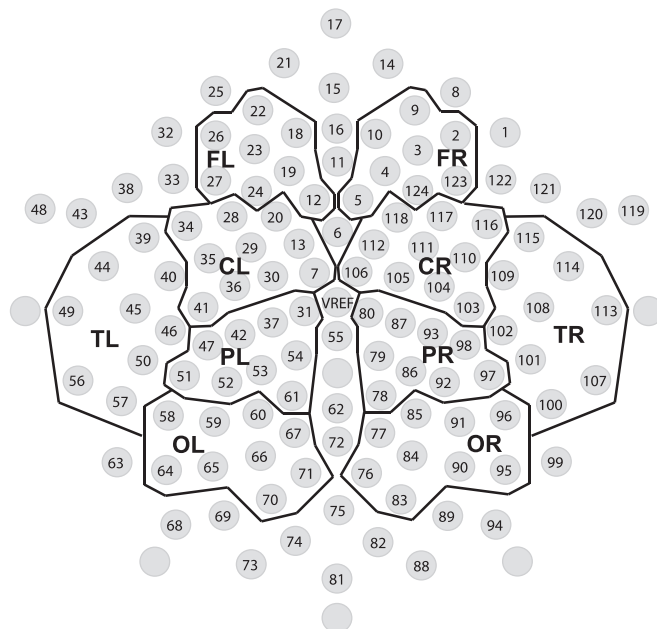

**Fig. S1.** The grouping of electrodes in the geodesic net (see *Materials and Methods* for details). Eighty-eight out of 128 electrodes were selected and divided into five groups (frontal, central, parietal, occipital, and temporal) for each hemisphere. The waveforms for all channels in each region were averaged together to represent EEG responses from that scalp region. The other 40 channels were excluded to avoid artifacts (electrodes near the edge of the net) and to enable comparisons across hemispheres (electrodes on the midline).
